# Supplementary material for: Constructing B and N separately co-doped carbon nanocapsules-wrapped Fe/Fe3C for oxygen reduction reaction with high current density
Source: Royal Society of Chemistry journal article supplement (doi:10.1039/c6cp05473k), 2016-01-01
Supplement: c6cp05473k1.pdf [file c6cp05473k1.pdf]

## Supporting Information

### Constructing B and N separate codoped carbon nanocapsules wrapped Fe/Fe<sub>3</sub>C for oxygen reduction reaction with high current density

He Feng, Lei Wang,\* Lu Zhao, Chungui Tian, Peng Yu and Honggang Fu\*

*Laboratory of Functional Inorganic Material Chemistry, Ministry of Education of the People's Republic of China, Heilongjiang University, Harbin 150080, P. R. China; E-mail: fuhg@vip.sina.com*

**Table S1.** The detailed experimental parameters for all the compared samples.

| samples                               | The dosage of melamine (g) | The dosage of H <sub>3</sub> BO <sub>3</sub> (g) | The dosage of Fe(NO <sub>3</sub> ) <sub>3</sub> •9H <sub>2</sub> O (g) | Pyrolysed temperature (°C) |
|---------------------------------------|----------------------------|--------------------------------------------------|------------------------------------------------------------------------|----------------------------|
| NGFe-800                              | 3                          | 0                                                | 3                                                                      | 800                        |
| B <sub>1</sub> NGFe <sub>2</sub> -800 | 3                          | 0.4                                              | 3                                                                      | 800                        |
| B <sub>2</sub> NGFe <sub>2</sub> -800 | 3                          | 0.6                                              | 3                                                                      | 800                        |
| B <sub>3</sub> NGFe <sub>2</sub> -800 | 3                          | 0.8                                              | 3                                                                      | 800                        |
| BNC-800                               | 3                          | 0.6                                              | 0                                                                      | 800                        |
| B <sub>2</sub> NGFe <sub>1</sub> -800 | 3                          | 0.6                                              | 2                                                                      | 800                        |
| B <sub>2</sub> NGFe <sub>3</sub> -800 | 3                          | 0.6                                              | 4                                                                      | 800                        |
| B <sub>2</sub> NGFe <sub>2</sub> -700 | 3                          | 0.6                                              | 3                                                                      | 700                        |
| B <sub>2</sub> NGFe <sub>2</sub> -900 | 3                          | 0.6                                              | 3                                                                      | 900                        |

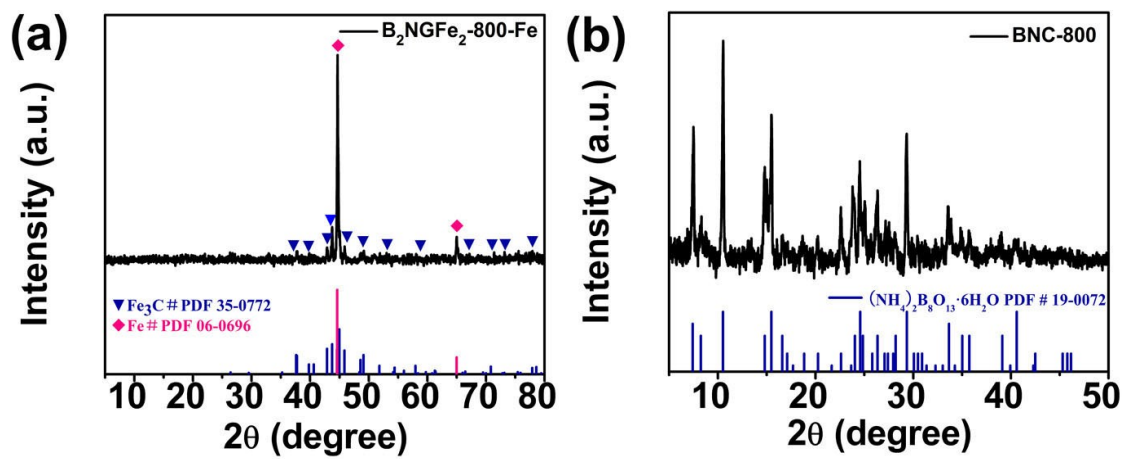

Fig. S1 XRD patterns of (a)  $B_2NGFe_2-800-Fe$  and (b) the BNC-800 composites.

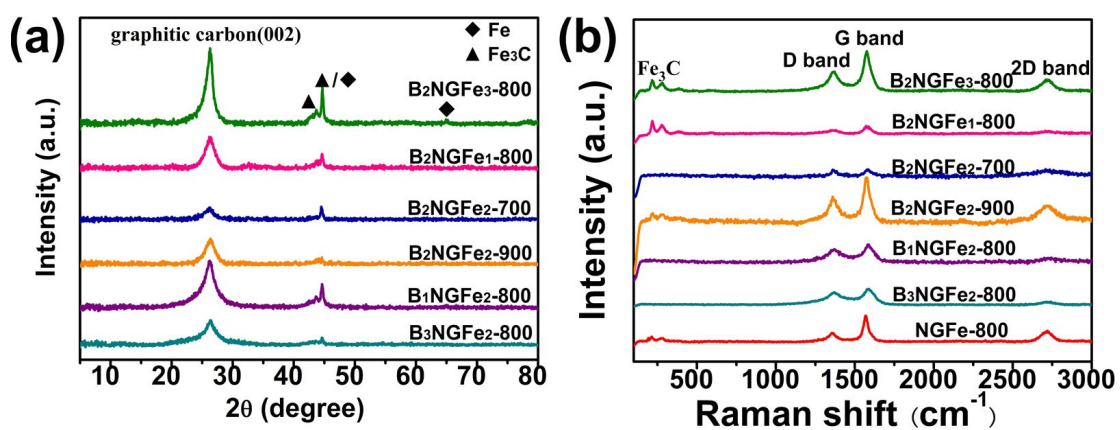

**Fig. S2** (a) XRD patterns and (b) Raman spectra of all the compared samples synthesized from different dosages of boric acid and iron nitrate, and different pyrolysed temperatures.

**Table S2.** The high-resolution XPS spectrum analytic results of B1s, N1s and Fe2p for B<sub>2</sub>NGFe<sub>2</sub>-800 and other compared samples.

| samples                               | B<br>content<br>(at.%) | C<br>content<br>(at.%) | N<br>content<br>(at.%) | O<br>content<br>(at.%) | Fe<br>content<br>(at.%) | B/N  | B/Fe |
|---------------------------------------|------------------------|------------------------|------------------------|------------------------|-------------------------|------|------|
| B <sub>2</sub> NGFe <sub>2</sub> -800 | 1.35                   | 90.11                  | 2.77                   | 4.87                   | 0.89                    | 0.49 | 1.5  |
| B <sub>1</sub> NGFe <sub>2</sub> -800 | 1.00                   | 86.34                  | 5.44                   | 6.77                   | 0.44                    | 0.18 | 2.3  |
| B <sub>3</sub> NGFe <sub>2</sub> -800 | 9.97                   | 69.59                  | 11.55                  | 8.64                   | 0.26                    | 0.86 | 38   |
| B <sub>2</sub> NGFe <sub>1</sub> -800 | 1.62                   | 87.30                  | 4.41                   | 5.90                   | 0.78                    | 0.37 | 2.1  |
| B <sub>2</sub> NGFe <sub>3</sub> -800 | 1.84                   | 87.36                  | 5.83                   | 3.91                   | 1.05                    | 0.32 | 1.8  |
| B <sub>2</sub> NGFe <sub>2</sub> -700 | 2.62                   | 78.52                  | 10.06                  | 7.99                   | 0.80                    | 0.26 | 3.3  |
| B <sub>2</sub> NGFe <sub>2</sub> -900 | 10.84                  | 66.71                  | 11.40                  | 10.79                  | 0.26                    | 0.95 | 42   |
| NGFe-800                              | 0.00                   | 90.17                  | 3.23                   | 6.04                   | 0.56                    | 0    | 0    |

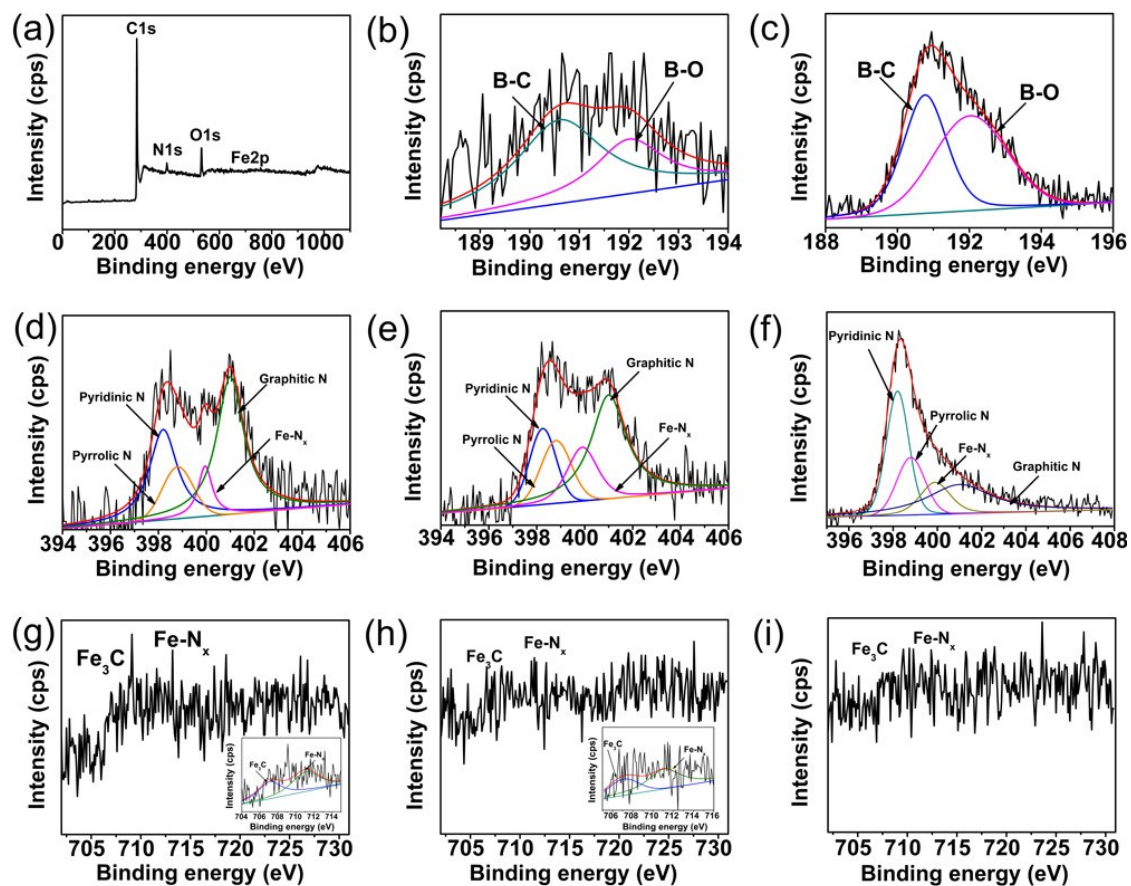

**Fig. S3** (a) Survey XPS spectrum, (d) N1s and (g) Fe2p XPS spectra of NGFe-800 composite; (b) B1s, (e) N1s and (h) Fe2p XPS spectra of B<sub>1</sub>NGFe<sub>2</sub>-800 composite; Survey XPS spectrum, (c) B1s, (f) N1s and (i) Fe2p XPS spectra of B<sub>3</sub>NGFe<sub>2</sub>-800 composite.

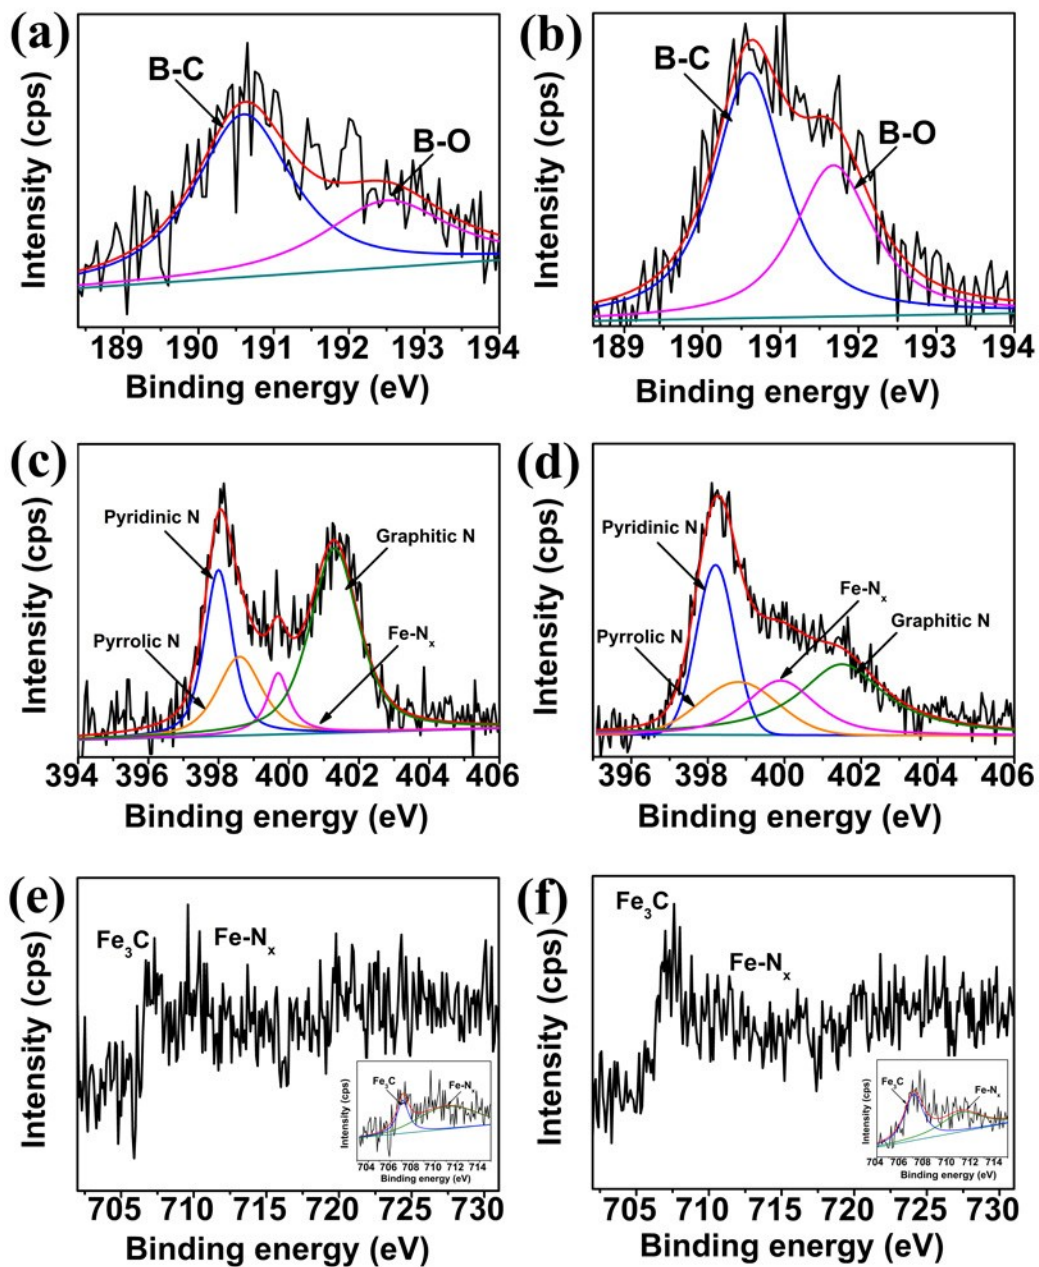

**Fig. S4** (a) B<sub>1</sub>s, (c) N<sub>1</sub>s and (e) Fe<sub>2</sub>p XPS spectra of B<sub>2</sub>NGFe<sub>3</sub>-800 composite; (b) B<sub>1</sub>s, (d) N<sub>1</sub>s and (f) Fe<sub>2</sub>p XPS spectra of B<sub>2</sub>NGFe<sub>1</sub>-800 composite.

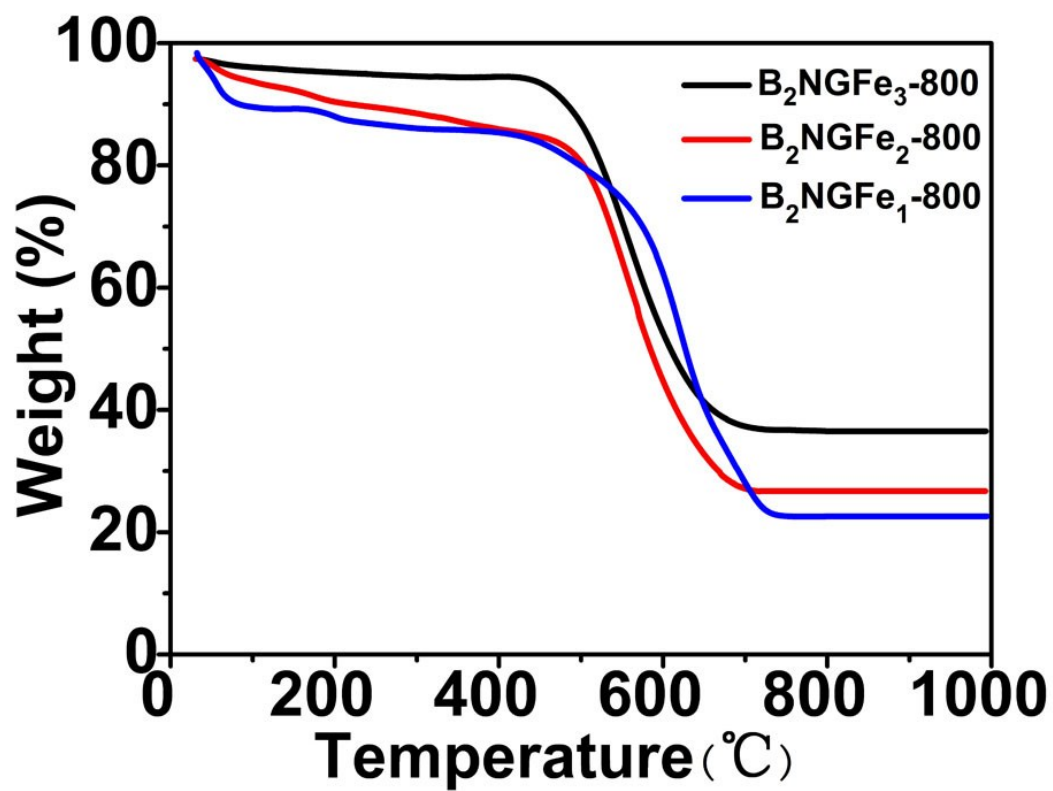

Fig. S5 TGA curves of B<sub>2</sub>NGFe<sub>1</sub>-800, B<sub>2</sub>NGFe<sub>2</sub>-800 and B<sub>2</sub>NGFe<sub>3</sub>-800 composites.

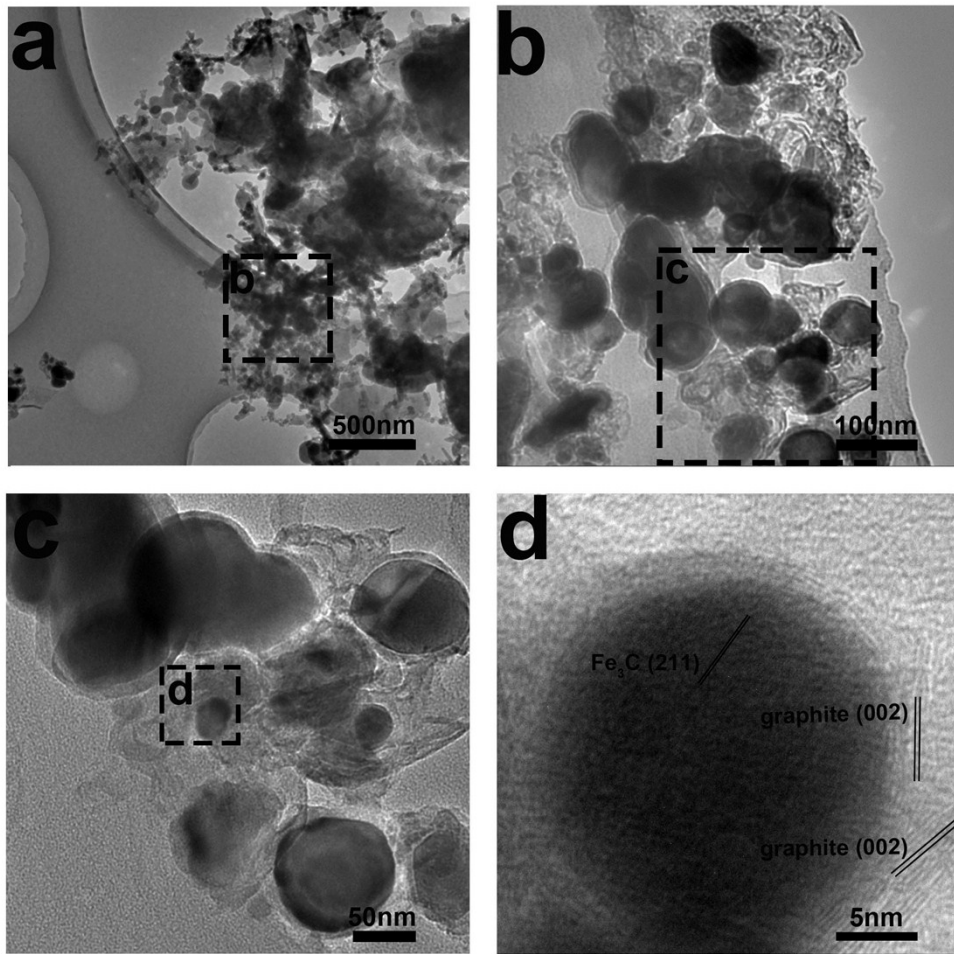

**Fig. S6** TEM and HRTEM images of  $B_2NGFe_2-800-Fe$  composite without treating by HCl.



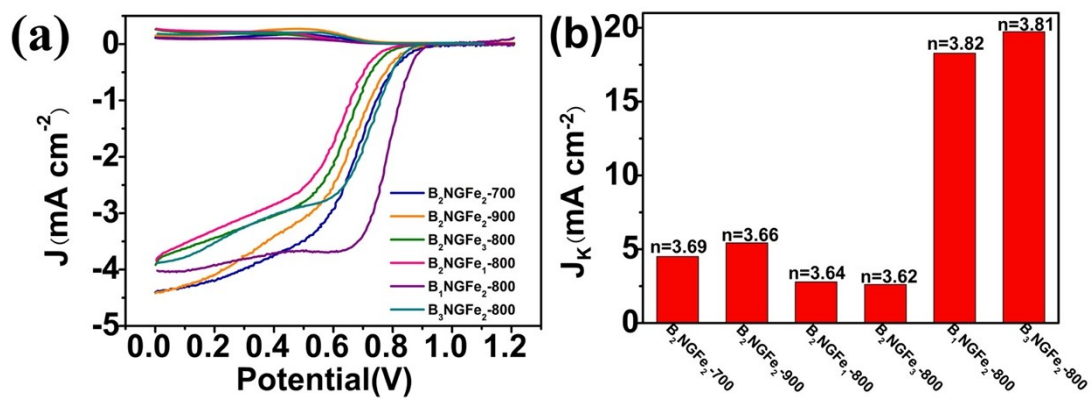

**Fig. S7** (a) RRDE voltammetric response in O<sub>2</sub>-saturated 0.1 M KOH electrolyte at a scan rate of 5 mV s<sup>-1</sup> and (b) electrochemical activity given as the kinetic current density (J<sub>k</sub>) at 0.6 V for compared electrodes; The electrode rotation rate was 1600 rpm, and the Pt ring electrode was polarized at 1.2 V.

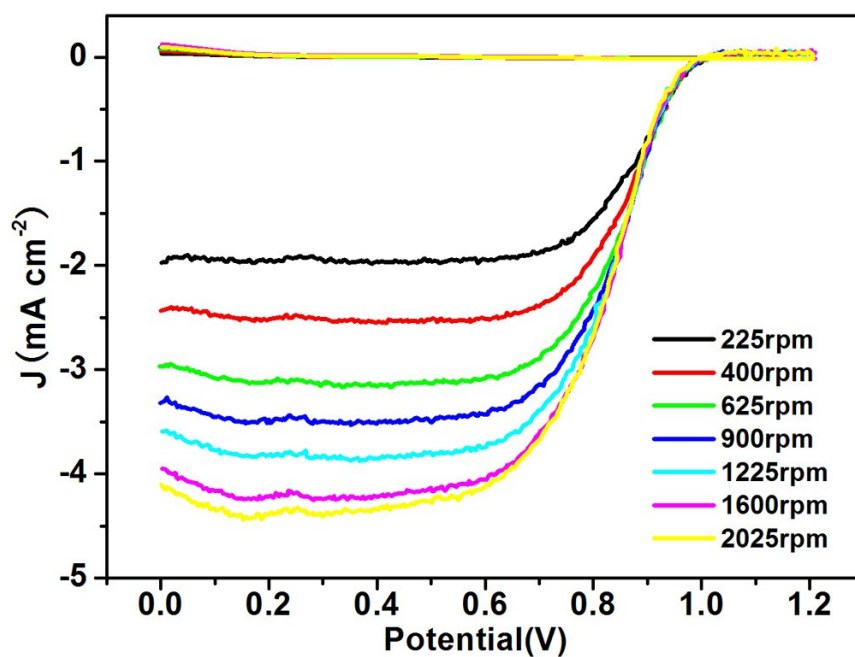

**Fig. S8** RRDE curves of Pt/C on a RRDE in an O<sub>2</sub>-saturated 0.1 M KOH electrolyte with various rotating speeds at scan rates of 5 mV s<sup>-1</sup>.

**Table S3.** Current densities of B<sub>2</sub>NGFe<sub>2</sub>-800 and Pt/C for ORR at different potentials.

| Current density<br>(m A cm <sup>-2</sup> ) | 0.1V | 0.2V | 0.3V | 0.4V | 0.5V | 0.6V | 0.7V | 0.8V | 0.9V |
|--------------------------------------------|------|------|------|------|------|------|------|------|------|
| B <sub>2</sub> NGFe <sub>2</sub> -800      | 4.8  | 4.9  | 4.9  | 4.9  | 4.9  | 4.8  | 4.6  | 2.9  | 0.5  |
| Pt/C                                       | 4.2  | 4.2  | 4.2  | 4.2  | 4.2  | 4.1  | 3.7  | 2.6  | 0.4  |

**Table S4.** The comparison of ORR performance of B<sub>2</sub>NGFe<sub>2</sub>-800 with other Pt-free ORR electrocatalysts (vs. RHE)

| Catalysts                                            | Loading (mg cm <sup>-2</sup> ) | electrolyte | $E_{1/2}$ (V) | $E_{\text{Onset}}$ (V) | $J_{\text{K}}$ (mA cm <sup>-2</sup> ) | Ref       |
|------------------------------------------------------|--------------------------------|-------------|---------------|------------------------|---------------------------------------|-----------|
| B <sub>2</sub> NGFe <sub>2</sub> -800                | 0.3 mg cm <sup>-2</sup>        | 0.1M KOH    | 0.83          | 0.98                   | 72.7                                  | This work |
| Fe@C-FeNCs                                           | 0.7 mg cm <sup>-2</sup>        | 0.1M KOH    | 0.899         | 1.0                    | 41.6 A/g at 0.80 V                    | 1         |
| Fe-N/C-800                                           | 0.1 mg cm <sup>-2</sup>        | 0.1M KOH    | 0.809         | 0.923                  | Not mentioned                         | 2         |
| Fe <sub>3</sub> C/C hollow spheres                   | 0.6 mg cm <sup>-2</sup>        | 0.1M KOH    | 0.83          | 1.05                   | Not mentioned                         | 3         |
| Fe@N-C/SiC@N-C                                       | 1.0 mg cm <sup>-2</sup>        | 0.1M KOH    | 0.84          | 0.88                   | Not mentioned                         | 4         |
| Fe-N-Doped Carbon Capsules                           | 0.1 mg cm <sup>-2</sup>        | 0.1M KOH    | 0.83          | 0.94                   | 18.3 mA cm <sup>-2</sup>              | 5         |
| N-doped mesoporous carbons with a trace amount of Fe | 0.08 mg cm <sup>-2</sup>       | 0.1M KOH    | Not mentioned | 0.98                   | Not mentioned                         | 6         |
| B and N isolate-doped graphitic nanosheets           | 0.2 mg cm <sup>-2</sup>        | 0.1M KOH    | Not mentioned | 0.95                   | 11.9 mA cm <sup>-2</sup> @0.7V        | 7         |

**References in here:**

1. W.-J. Jiang, L. Gu, L. Li, Y. Zhang, X. Zhang, L.-J. Zhang, J.-Q. Wang, J.-S. Hu, Z. Wei, L.-J. Wan. *J. Am. Chem. Soc.*, **2016**, *138*, 3570–3578.
2. L. Lin, Q. Zhu, A.-W. Xu. *J. Am. Chem. Soc.*, **2014**, *136*, 11027–11033.

3. Y Hu, J.O. Jensen, W Zhang, Lars N. Cleemann, W Xing, Niels J. Bjerrum, Q. Li. *Angew. Chem. Int. Ed.*, **2014**, *53*, 3675–3679.
4. J. Li, J. W, D. Gao, X. Li, S. M, G. Wang, X. Bao. *Catal. Sci. Technol.*, **2016**, *6*, 2949–2954.
5. G. A. Ferrero, K. Preuss, A. Marinovic, A. B. Jorge, N. Mansor, D. J. L. Brett, A. B. Fuertes, M. Sevilla, M. Titirici. *ACS Nano*, **2016**, *10*, 5922–5932.
6. W. Niu, L. Li, X. Liu, N Wang, J Liu, W. Zhou, Z. Tang, S. Chen. *J. Am. Chem. Soc.*, **2015**, *137*, 5555–5562.
7. L. Wang, P. Yu, L. Zhao, C. Tian, D. Zhao, W Zhou, J Yin, R. Wang, H. Fu. *Sci. Rep.*, **2014**, *4*, 5184.
